# Supplementary material
Source: Springer Nature journal article supplement (https://www.springermedizin.de/resource/supplementary/12936_2011_2438_MOESM2_ESM.pdf/9542636)

**A** HB3 v s Dd2

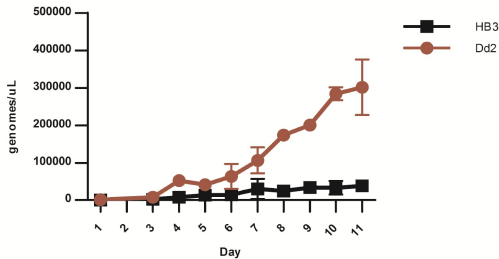

**B** Dd2

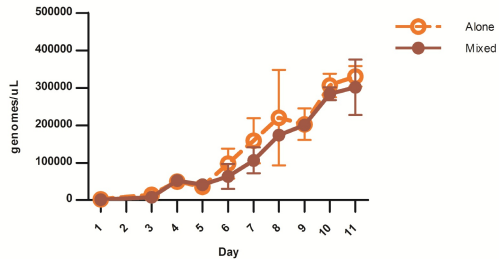

**C** HB3

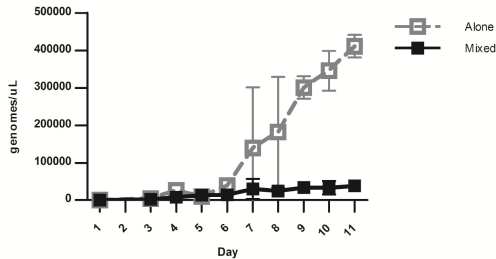

Supplement: MOESM2 [file 9542636]
